# Supplementary material for: Novel bipharmacophoric inhibitors of the cholinesterases with affinity to the muscarinic receptors M1and M2
Source: Royal Society of Chemistry journal article supplement (doi:10.1039/c7md00149e), 2017-01-01
Supplement: c7md00149e1.pdf [file c7md00149e1.pdf]

## Supporting Information

1  
2

### 3 **Novel Bipharmacophoric Inhibitors of the Cholinesterases with Affinity to the Muscarinic** 4 **Receptors M<sub>1</sub> and M<sub>2</sub>**

5

6 Regina Messerer<sup>a</sup>, Clelia Dallanoce<sup>b</sup>, Carlo Matera<sup>b</sup>, Sarah Wehle<sup>a</sup>, Lisa Flammini<sup>c</sup>, Brian  
7 Chirinda<sup>d</sup>, Andreas Bock<sup>e</sup>, Matthias Irmen<sup>d</sup>, Christian Tränkle<sup>d</sup>, Elisabetta Barocelli<sup>c</sup>, Michael  
8 Decker<sup>a</sup>, Christoph Sotriffer<sup>a</sup>, Marco De Amici<sup>b</sup>, Ulrike Holzgrabe<sup>a,\*</sup>

9

10 <sup>a</sup> *Pharmaceutical and Medicinal Chemistry, Institute of Pharmacy and Food Chemistry,*  
11 *University of Würzburg, Am Hubland, 97074 Würzburg, Germany*

12 <sup>b</sup> *Dipartimento di Scienze Farmaceutiche, Sezione di Chimica Farmaceutica "Pietro Pratesi",*  
13 *Università degli Studi di Milano, Via Mangiagalli 25, 20133 Milano, Italy*

14 <sup>c</sup> *Dipartimento di Farmacia, Università degli Studi di Parma, Parco Area delle Scienze, 27/A,*  
15 *43124 Parma, Italy*

16 <sup>d</sup> *Pharmacology and Toxicology, Institute of Pharmacy, University of Bonn, Gerhard-*  
17 *Domagk-Straße 3, 53121 Bonn, Germany*

18 <sup>e</sup> *Institute of Pharmacology and Toxicology, University of Würzburg, Versbacher Strasse 9,*  
19 *97078 Würzburg, Germany*

20

### 21 **Table of Contents**

- 22 - M<sub>2</sub> binding experiments
- 23 - M<sub>1</sub> binding experiments
- 24 - logP values
- 25 - Sequence alignment for acetylcholinesterases

26 Table S1: Numerical estimates of parameters from binding experiments characterizing the  
 27 interaction of the test compounds with the inverse orthosteric agonist NMS at muscarinic  
 28  $M_2$  receptors.

29

30

31

32

33

34

35

36

37

38

39

40

41

| Compound      | [ <sup>3</sup> H]NMS-dissociation kinetics |         | [ <sup>3</sup> H]NMS-equilibrium binding |         |
|---------------|--------------------------------------------|---------|------------------------------------------|---------|
|               | Log $K_{X,diss}$                           | n       | logIC <sub>50</sub>                      | n       |
|               | X○NMS- $M_2$                               | slope   | X○ $M_2$                                 | slope   |
| <b>10-C7</b>  | -6.36*                                     | -1.17   | -8.38                                    | -0.63   |
|               | ±0.04                                      | ±0.14   | ±0.08                                    | ±0.05** |
| <b>10-C10</b> | -6.94                                      | -0.67   | -8.24*                                   | -0.98   |
|               | ±0.04                                      | ±0.05** | ±0.09                                    | ±0.16   |
| <b>7b-C10</b> | -7.18*                                     | -0.77   | -8.53                                    | -0.76   |
|               | ±0.05                                      | ±0.08   | ±0.04                                    | ±0.05** |
| <b>7a-C10</b> | -5.57*                                     | -0.88   | -8.42                                    | -0.63   |
|               | ±0.07                                      | ±0.13   | ±0.05                                    | ±0.04** |
| <b>7a-C6</b>  | -4.93*, §                                  | -0.89   | -6.03*                                   | -0.98   |
|               | ± 0.03                                     | ±0.05   | ±0.02                                    | ±0.05   |

42 log $K_{X,diss}$ , log binding constant of the allosteric agent X for NMS-bound receptors measured as the  
 43 concentration of the test compound ligand that reduces the dissociation rate constant of [<sup>3</sup>H]NMS  
 44 dissociation by 50%; n: slope factor of the curve; logIC<sub>50</sub>: log concentration of the test compound X reducing  
 45 the specific binding of the orthosteric radioligand [<sup>3</sup>H]NMS in the absence of X by 50%. The data shown are  
 46 mean values ± S.E.M. of three to four experiments carried out in duplicate (dissociation) or triplicate  
 47 (equilibrium binding). \*, value was determined with curve slope fixed to unity; \*\*, value deviates significantly  
 48 from unity (F-test, P<0.05). §, value was taken from Bock et al. 2014. For further details see references Fang  
 49 et al. 2010 and detailed pharmacological procedures.

50

51

52

53

54

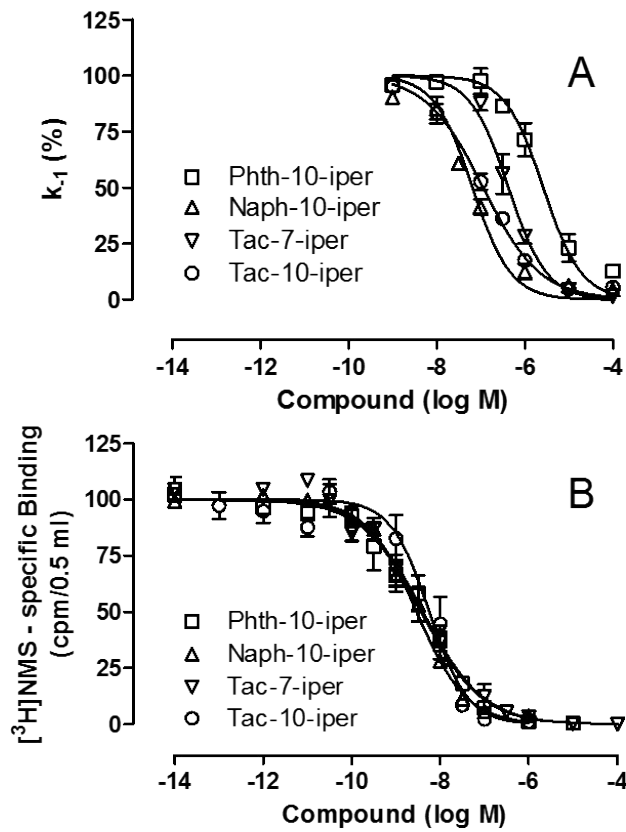

55

56 Figure S1: (A) Retardation of NMS dissociation expressed as concentration-effect curves of selected  
 57 test-compounds on the dissociation rate constant  $k_{-1}$  of the radioligand  $[^3H]NMS$  to determine  
 58  $\log K_{x,diss}$  as an affinity measure of the test compounds at  $M_2$  receptors that are orthosterically  
 59 blocked by NMS. (B) Test-compound induced inhibition of specific  $[^3H]NMS$  (0.2 nM) equilibrium  
 60 binding to estimate corresponding affinity measures at orthosterically unliganded  $M_2$  receptors.  
 61 Curves were obtained by logistic curve fitting. The data illustrated are mean values  $\pm$  S.E.M. of three  
 62 to four experiments carried out as (A) duplicate or (B) triplicate determinations.

63

64

65

66

67

68

69

70

71

72 *Table S2: Numerical estimates of parameters from binding experiments characterizing the*  
 73 *interaction of selected test compounds with the inverse orthosteric agonist NMS at muscarinic*  
 74 *M<sub>1</sub> receptors.*

75

76

77

78

79

80

81

82

| Compound      | [ <sup>3</sup> H]NMS-dissociation kinetics |                    | [ <sup>3</sup> H]NMS-equilibrium binding |        |
|---------------|--------------------------------------------|--------------------|------------------------------------------|--------|
|               | LogK <sub>X,diss</sub>                     | n                  | logIC <sub>50</sub>                      | n      |
|               | X○NMS-M <sub>1</sub>                       | slope              | X○M <sub>1</sub>                         | slope  |
| <b>10-C7</b>  | -5.59*                                     | -0.81              | -7.49*                                   | -0.98  |
|               | ±0.08                                      | ±0.12              | ±0.06                                    | ±0.14* |
| <b>10-C10</b> | -5.98*, <sup>§</sup>                       | -0.89 <sup>§</sup> | -7.72*                                   | -1.05  |
|               | ±0.11                                      | ±0.20              | ±0.05                                    | ±0.11  |

83 logK<sub>X,diss</sub>, log binding constant of the allosteric agent X for NMS-bound receptors measured as the  
 84 concentration of the test compound ligand that reduces the dissociation rate constant of [<sup>3</sup>H]NMS  
 85 dissociation by 50%; n: slope factor of the curve; logIC<sub>50</sub>: log concentration of the test compound X reducing  
 86 the specific binding of the orthosteric radioligand [<sup>3</sup>H]NMS in the absence of X by 50%. The data shown are  
 87 mean values ± S.E.M. of three to four experiments carried out in duplicate (dissociation) or quadruplicate  
 88 (equilibrium binding). \*, value was determined with curve slope fixed to unity; <sup>§</sup>, values derived with bottom  
 89 plateau significantly different from zero (F-test, P<0.05). For further details see references Fang et al. 2010  
 90 and detailed pharmacological procedures.

91

92

93

94

95

96

97

98

99

100

101

102

103

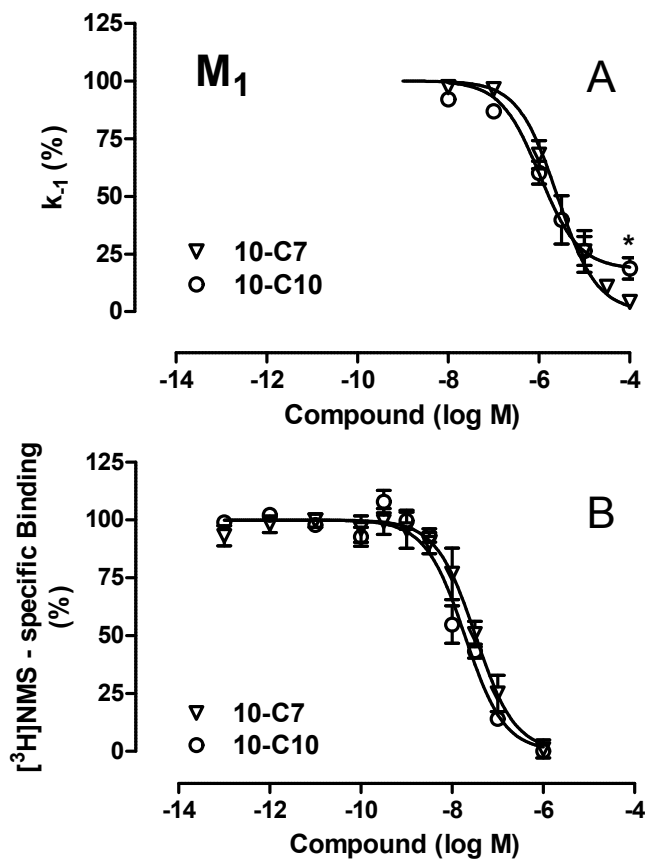

104

105 Figure S2: (A) Retardation of NMS dissociation expressed as concentration-effect curves of selected  
 106 test-compounds on the dissociation rate constant  $k_{-1}$  of the radioligand  $[^3\text{H}]$ NMS to determine  
 107  $\log K_{x,diss}$  as an affinity measure of the test compounds at  $M_1$  receptors that are orthosterically  
 108 blocked by NMS. (B) Test-compound induced inhibition of specific  $[^3\text{H}]$ NMS (0.2 nM) equilibrium  
 109 binding to estimate corresponding affinity measures at orthosterically unliganded  $M_1$  receptors.  
 110 Curves were obtained by logistic curve fitting. The data illustrated are mean values  $\pm$  S.E.M. of three  
 111 to four experiments carried out as (A) duplicate or (B) quadruplicate determinations. \*, bottom  
 112 plateau deviates significantly from zero (F-Test,  $P < 0.05$ ).

113

114

115

116

117

118

119

120

121

122 Table S3: Experimentally determined  $\log k'$  and calculated  $\log P$  values of selected reference  
 123 substances.

| Reference substance | $\log k'$ | $\log P^1$ |
|---------------------|-----------|------------|
| Biphenyl            | 1.08      | 4.01       |
| Ethylbenzene        | 0.87      | 3.15       |
| Chlorobenzene       | 0.62      | 2.89       |
| Toluene             | 0.66      | 2.73       |
| Benzene             | 0.41      | 2.13       |
| 2-Phenylethanol     | -0.01     | 1.36       |
| Acetanilide         | -0.22     | 1.00       |
| 2-Butanone          | -0.35     | 0.30       |

124

125

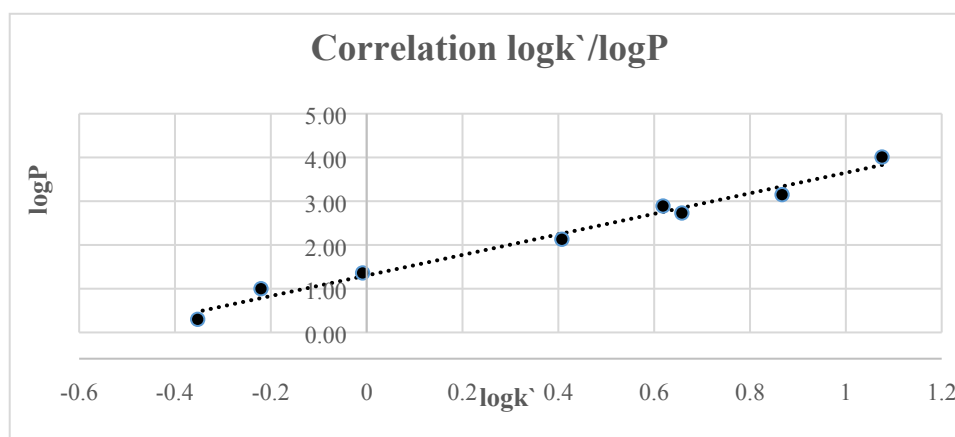

126

127

128

129

130

131

132

133

134

135

136

137 *Table S4: Experimentally determined  $k'$  and  $\log k'$  values and calculated  $\log P$  values of the hybrid*  
138 *compounds.*

| <b>Compound</b> | <b><math>k'</math></b> | <b><math>\log k'</math></b> | <b><math>\log P</math></b> |
|-----------------|------------------------|-----------------------------|----------------------------|
| <b>7a-C7</b>    | 0.60                   | -0.22                       | 0.79                       |
| <b>7a-C8</b>    | 0.60                   | -0.22                       | 0.78                       |
| <b>7a-C9</b>    | 0.60                   | -0.22                       | 0.79                       |
| <b>7a-C10</b>   | 0.61                   | -0.21                       | 0.80                       |
| <b>8a-C4</b>    | 1.27                   | 0.11                        | 1.55                       |
| <b>8a-C6</b>    | 0.74                   | -0.13                       | 0.99                       |
| <b>8a-C8</b>    | 0.63                   | -0.20                       | 0.83                       |
| <b>6a-C6</b>    | 0.63                   | -0.20                       | 0.84                       |
| <b>6b-C6</b>    | 1.26                   | 0.10                        | 1.54                       |
| <b>7b-C7</b>    | 1.47                   | 0.17                        | 1.70                       |
| <b>7b-C8</b>    | 1.35                   | 0.13                        | 1.61                       |
| <b>7b-C9</b>    | 1.46                   | 0.16                        | 1.69                       |
| <b>7b-C10</b>   | 1.58                   | 0.20                        | 1.77                       |
| <b>10-C10</b>   | 6.96                   | 0.84                        | 3.28                       |
| <b>10-C7</b>    | 2.08                   | 0.32                        | 2.05                       |

139

140

141

142

143

144

145 **Sequence alignment**

146 The identity and homology between *eeAChE* and *hAChE* amounts to 88% and 93%,  
147 respectively. Therefore, *eeAChE* can be used to replace *hAChE* in enzyme kinetic  
148 measurements. *TcAChE* shows an identity and homology of about 57% and 73%,  
149 respectively, to both *eeAChE* and *hAChE*. The binding site of these three isoforms is highly  
150 conserved, with the replacement of Phe330 in *eeAChE* and *TcAChE* by Tyr337 in *hAChE* as  
151 the main difference. Thus, *TcAChE* can safely be used as model system for docking studies  
152 even though enzyme kinetic data may be obtained with other AChE isoforms.

153

154

155 *Table S5: Sequence alignment of electric eel, torpedo californica and human AChE with identity*  
156 *(left) and homology (right).*

157

|               | Identity [%]  |               |              | Homology [%]  |               |              |
|---------------|---------------|---------------|--------------|---------------|---------------|--------------|
|               | <i>TcAChE</i> | <i>eeAChE</i> | <i>hAChE</i> | <i>TcAChE</i> | <i>eeAChE</i> | <i>hAChE</i> |
| <i>TcAChE</i> | 100           | 57.7          | 56.5         | 100           | 73.4          | 73.8         |
| <i>eeAChE</i> | -             | 100           | 88.0         | -             | 100           | 93.0         |
| <i>hAChE</i>  | -             | -             | 100          | -             | -             | 100          |

158

159

160

161 **Method:**

162 Pairwise sequence alignment was carried out with the Needle program, using the  
163 EBLOSUM62 matrix of EMBOSS v.6.3.1.<sup>2</sup> The PDB-IDs 4EY7 (human),<sup>3</sup> 1C2O (electric eel)<sup>4</sup>  
164 and 2CKM (torpedo californica)<sup>5</sup> were taken for comparison.

165

166

167

168

169

170

171

172

173



174 **References**

175

176 1. C. Hansch, A. Leo and D. Hoekman, *Exploring QSAR: Volume 2: Hydrophobic, Electronic and*  
177 *Steric Constants, American Chemical Society, Washington DC, 1995.*

178 2. P. Rice, I. Longden and A. Bleasby, *Trends Genet.*, 2000, **16**, 276-277.

179 3. J. Cheung, M. J. Rudolph, F. Burshteyn, M. S. Cassidy, E. N. Gary, J. Love, M. C. Franklin and J. J.  
180 Height, *J. Med. Chem.*, 2012, **55**, 10282-10286.

181 4. Y. Bourne, J. Grassi, P. E. Bougis and P. Marchot, *J. Biol. Chem.*, 1999, **274**, 30370-30376.

182 5. E. H. Rydberg, B. Brumshtein, H. M. Greenblatt, D. M. Wong, D. Shaya, L. D. Williams, P. R.  
183 Carlier, Y. P. Pang, I. Silman and J. L. Sussman, *J. Med. Chem.*, 2006, **49**, 5491-5500.

184
